# Supplementary material for: In situ fabrication of Ag3PO4/TiO2 nanotube heterojunctions with enhanced visible-light photocatalytic activity
Source: Royal Society of Chemistry journal article supplement (doi:10.1039/c4cp05851h), 2015-01-01
Supplement: c4cp05851h1.pdf [file c4cp05851h1.pdf]

## Supporting information

### *In situ* fabrication of $\text{Ag}_3\text{PO}_4/\text{TiO}_2$ nanotube heterojunction with enhanced visible-light photocatalytic activity

Zhen Wei Tong,<sup>ad</sup> Dong Yang,<sup>bcd</sup> Yuan Yuan Sun,<sup>bd</sup> Yao Tian<sup>b</sup> and Zhong Yi Jiang<sup>\*ad</sup>

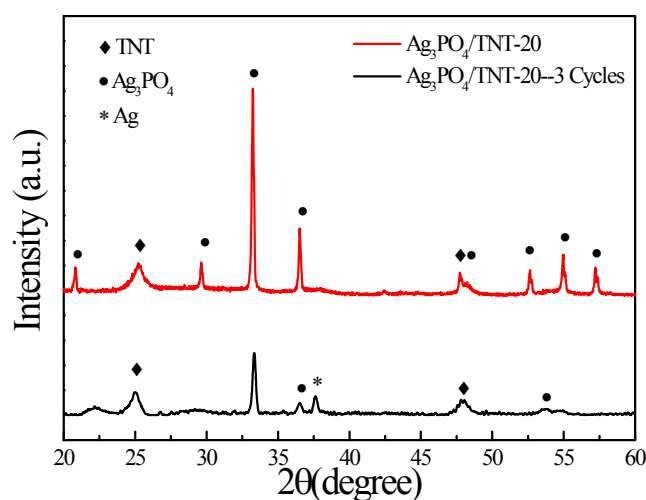

Fig. S1 XRD patterns of  $\text{Ag}_3\text{PO}_4/\text{TNT-20}$  sample before and after three cycles.

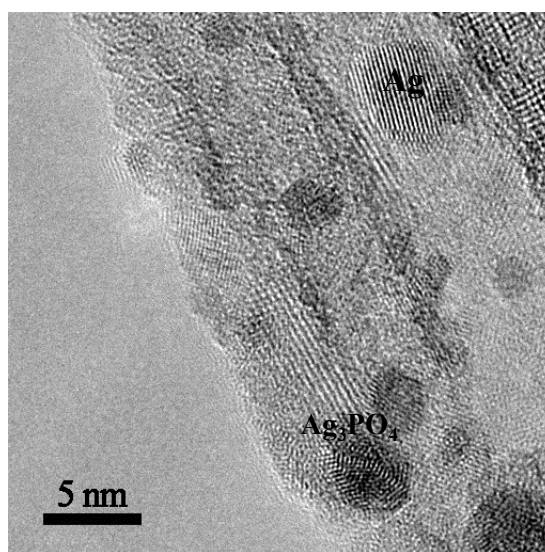

Fig. S2 HRTEM image of  $\text{Ag}_3\text{PO}_4/\text{TNT-20}$  sample after three cycles.

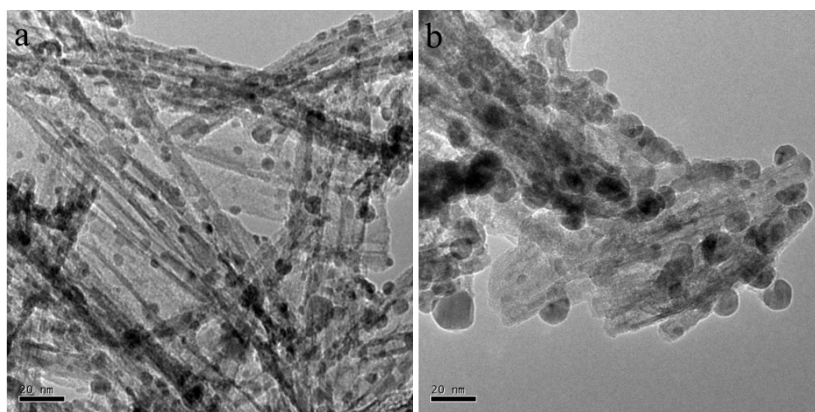

Fig. S3 TEM images of (a)  $\text{Ag}_3\text{PO}_4/\text{TNT-60}$  and (b)  $\text{Ag}_3\text{PO}_4/\text{TNT-80}$  samples.
